# Supplementary material
Source: publisher site journal article supplement (https://www.spandidos-publications.com/2065/downloadSupplementary)

Figure S1. Statistical analysis of the expression levels of EMT markers (ZO-1, E-cadherin, N-cadherin, and vimentin) in *LINC01554*-overexpressing HCCLM9 (A) and SK-Hep1 (B) cells were analysed by western blotting. \* $P < 0.05$ , \*\* $P < 0.01$ , compared to the Lv-NC group. EMT, epithelial-mesenchymal transition.

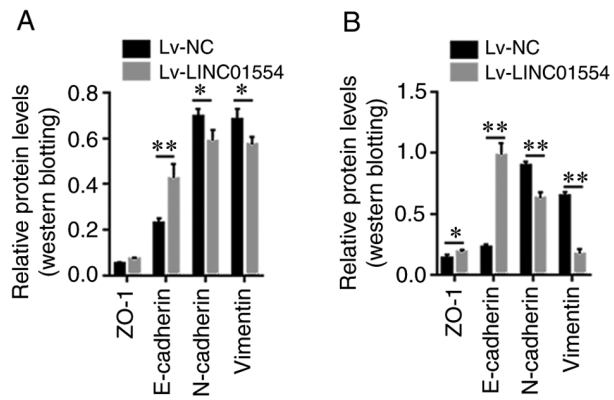

Figure S2. Statistical analysis of expression levels of proteins related to Wnt and PI3K-Akt signalling (Akt, p-Akt, Gsk3 $\beta$ , p-Gsk3 $\beta$ , and  $\beta$ -catenin) in HCC cells were analysed by western blotting in the *LINC01554*-overexpressing HCCLM9 (A) and SK-Hep1 (B) cells. \*P<0.05, \*\*P<0.01, compared to the Lv-NC group. PI3K, phosphoinositide 3-kinase; Gsk3 $\beta$ , glycogen synthase kinase 3 $\beta$ ; Akt, protein kinase B or (PKB); p-, phosphorylated.

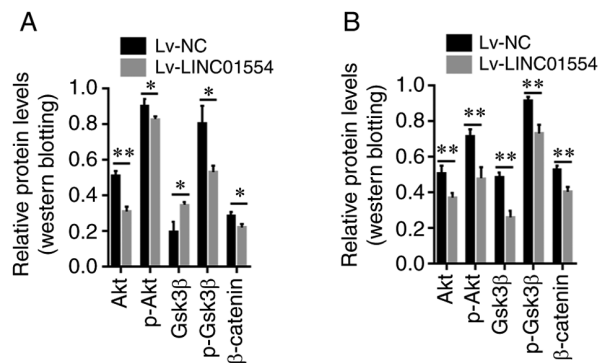

Supplement: Supplementary file 1 [file downloadSupplementary]
